# Supplementary material
Source: publisher site journal article supplement (https://www.dovepress.com/article/385646)
Supplement: Supplementary file 1 [file get_supplementary_file.php]

**Supplementary table 1.** ATC codes used to define the treatment groups.

| <b>Drug Group</b>       | <b>ATC</b>                          | <b>Description</b>                                                                         |
|-------------------------|-------------------------------------|--------------------------------------------------------------------------------------------|
| Insulin                 | A10A*                               | Insulin alone                                                                              |
| Metformin               | A10BA02 OR A10BD02 OR<br>A10BD05    | Metformin alone or in pre-established association with sulphonylureas or with pioglitazone |
| Sulphonylureas/Glinides | A10BB* OR A10BX02                   | Sulphonylureas or glinides                                                                 |
| Acarbose/Pioglitazone   | A10BF01 OR A10BG03 OR<br>A10BD06    | Pioglitazone alone or in pre-established association with sulphonylureas                   |
| DPP4i                   | A10BH* OR<br>A10BD07/08/09/10/11/21 | DPP4i alone or in pre-established association with metformin                               |
| GLP-1 RA                | A10BJ*                              | GLP-1 RA alone                                                                             |
| SGLT2i                  | A10BK* OR<br>A10BD13/15/16/19/20/23 | SGLT2i alone or in pre-established association with metformin                              |

**Abbreviations:** DPP4i, Dipeptidyl-Peptidase-4 inhibitors; GLP-1 RA, Glucagon-like peptide-1 receptor agonists; SGLT2i, Sodium-glucose cotransporter 2 inhibitors. \* denotes further extension of the ATC class.

**Supplementary table 2.** ICD-9-CM codes used to define hospitalization.

| ICD-9-CM codes | Description                                                         |
|----------------|---------------------------------------------------------------------|
| 043*           | SARS-CoV-2 disease (COVID-19)                                       |
| 480.4*         | Pneumonia in COVID-19                                               |
| 518.9*         | Respiratory Distress Syndrome (ARDS) in Covid-19                    |
| 519.7*         | Other respiratory tract infection in Covid-19                       |
| V01.85         | Exposure to SARS-CoV-2                                              |
| V07.00         | Need for isolation due to risk associated with SARS-CoV-2 infection |
| V12.04         | Personal history of SARS-CoV-2 (Covid-19) disease                   |
| V71.84         | Observation and Evaluation for Suspected SARS-CoV-2 Exposure        |
| 078.89         | SARS-CoV-2 disease                                                  |
| 518.8          | Other diseases of lung                                              |
| 428*           | Heart failure                                                       |
| 410*           | Acute myocardial infarction                                         |
| 411*           | Altre forme acute e subacute di cardiopatia ischemica               |
| 414*           | Other acute and subacute forms of ischemic heart disease            |
| 413*           | Angina pectoris                                                     |
| 434*           | Occlusion of cerebral arteries                                      |
| 444*           | Arterial embolism and thrombosis                                    |

**Note:** The ICD-9-CM coding related to SARS-CoV-2 infection was updated with the Italian Ministry of Health Decree on 28 October 2020. \* denotes further extension of the ICD-9 code.

**Supplementary table 3.** Criteria used to define comorbidities taken in consideration.

| <b>Pathology</b>                     | <b>Co-payment exemption codes</b> | <b>Drug prescriptions (ATC codes)</b>              | <b>Algorithm</b>                                    |
|--------------------------------------|-----------------------------------|----------------------------------------------------|-----------------------------------------------------|
| Hypertension                         | 031                               | C07* OR C08* OR C09*                               | ≥ 2 drug prescriptions in 1 year OR exemption code  |
| Dyslipidemia                         | 025                               | C10*                                               | ≥ 2 drug prescriptions in 1 year OR exemption code  |
| Cardiovascular diseases <sup>a</sup> | A02 OR B02 OR C02 OR 021          | B01AA* OR B01AC* (NOT B01AC06) OR B01AE* OR B01AF* | ≥ 2 drug prescriptions in 1 year OR exemption codes |
| Renal failure                        | 023                               | B03XA*                                             | ≥ 4 drug prescriptions in 1 year OR exemption code  |
| Primary immunodeficiency             | RCG160                            | J06BA*                                             | ≥ 1 drug prescriptions in 1 year OR exemption code  |
| Acquired immunodeficiencies          | -                                 | L01* OR L3AA* OR L04* OR H02AB*                    | ≥ 2 drug prescriptions in 1 year                    |
| Cancer                               | 048                               | -                                                  | Exemption code 048                                  |
| Chronic respiratory diseases         | 024 OR 057                        | R03A*                                              | ≥ 4 drug prescriptions in 1 year OR exemption codes |

**Note:** <sup>a</sup> heart failure, arrhythmias, atrial fibrillation, ischemic heart disease. \* denotes further extension of the ATC class.
